# Supplementary material
Source: MDPI journal article supplement (https://www.mdpi.com/2227-9040/9/11/303)
Supplement: s1 [file s1]

# Supplementary Materials

## Development of a New Screen-Printed Transducer for the Electrochemical Detection of Thiram

David Ibáñez \*, Daniel Izquierdo-Bote, María Begoña González-García, David Hernández-Santos and Pablo Fanjul-Bolado \*

Metrohm DropSens S.L., Vivero de Ciencias de la Salud, C/Colegio Santo Domingo de Guzmán s/n, 33010 Oviedo (Asturias), Spain; daniel.izquierdo@metrohm.com (D.I.-B.);

begona.gonzalez@metrohm.com (M.B.G.-G.); david.hernandez@metrohm.com (D.H.-S.)

\* Correspondence: david.ibanez@metrohm.com (D.I.); pablo.fanjul@metrohm.com (P.F.-B.)

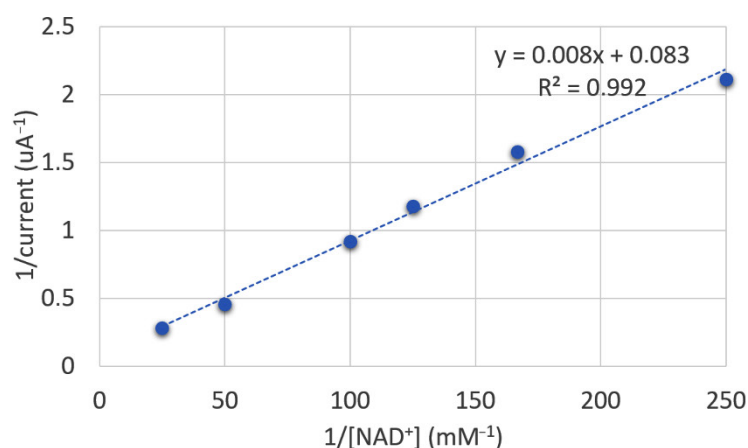

**Figure S1.** Lineweaver-Burk plot obtained for different concentrations of  $\text{NAD}^+$  in 0.39 U/mL ALDH, 0.39 U/mL DP, 2 mM AA, 1 mM  $\text{K}_3[\text{Fe}(\text{CN})_6]$ , 0.1 % BSA in 0.1 M phosphate + 0.1 M KCl buffer solution pH 8.0.

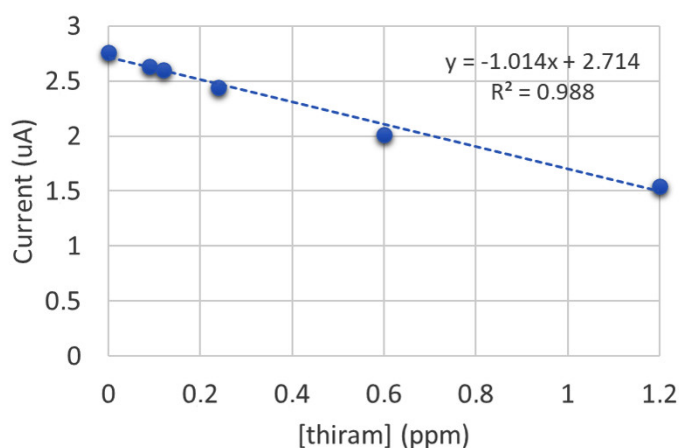

**Figure S2.** Calibration plot of thiram used for LOD calculation obtained in 0.58 U/mL ALDH, 0.58 U/mL DP and 2 mM PPA in 0.1 M phosphate + 0.1 M KCl buffer solution pH 8.0. DRP-110 modified with 10 mM  $\text{NAD}^+$  and 10 mM  $\text{K}_3[\text{Fe}(\text{CN})_6]$  was used as electrode.
